# Supplementary material for: Analysis of the “centrosome-ome” identifies MCPH1 deletion as a cause of centrosome amplification in human cancer
Source: PubMed Central journal article supplement (PMC7368085; doi:10.1038/s41598-020-68629-4), 2020-07-17

## **SUPPLEMENTAL DATA**

### **Analysis of the “centrosome-ome” identifies MCPH1 deletion as a cause of centrosome amplification in human cancer**

<sup>1,2,3</sup>Ryan A. Denu, <sup>1,2</sup>Mark E. Burkard

#### **Author Affiliations:**

1. Division of Hematology/Oncology, Department of Medicine, School of Medicine and Public Health, University of Wisconsin-Madison, Madison, WI, USA
2. Carbone Cancer Center, University of Wisconsin, Madison, WI, USA
3. Medical Scientist Training Program, School of Medicine and Public Health, University of Wisconsin-Madison, Madison, WI, USA

**Corresponding Author:** Mark Burkard, University of Wisconsin-Madison, 6059 WIMR, 1111 Highland Avenue, Madison, WI 53705, Phone: (608) 262-2803, email: meburkard@medicine.wisc.edu

**Supplemental Table 1. List of centrosome genes included in analysis.**

**Supplemental Table 2. Enrichment of centrosome gene alterations in p53 mutant/deleted tumors.**

**Supplemental Table 3. Analysis of genes required for centriole duplication.**

**Supplemental Table 4. Primer sequences for qRT-PCR.**

**Supplemental Figure 1. NPM1 mutations in acute myeloid leukemia (AML) do not cause centrosome amplification.**

(A) Diagram of NPM1 mutations in TCGA datasets using cBioPortal to extract and display the data. The most common alteration is a frameshift at the C terminus. (B) Kaplan-Meier curve demonstrating overall survival in AML patients with mutant NPM1 versus wild type NPM1. (C) Kaplan-Meier curve demonstrating disease-free survival in AML patients with mutant NPM1 versus wild type NPM1. P values from log rank tests are displayed. (D) Oncoprint of NPM1 alterations along with genes whose loss is permissive of proliferation in the setting of centrosome amplification (TP53, CDKN1A, PIDD1, CRADD, and CASP2). There is a lack of coincidence of NPM1 mutation with loss of these other genes. (E) Representative images of HeLa cells transfected with either wild type or mutant NPM1. (F) Quantification of centrioles (centrin foci) per cell in the indicated conditions. Each dot represents one cell and bars represent means  $\pm$  SD. (G) Quantification of the percentage of cells with centrosome amplification, defined as greater than 4 centrioles (centrin foci). Bars represent means  $\pm$  SEM. NS = not significant.

**a**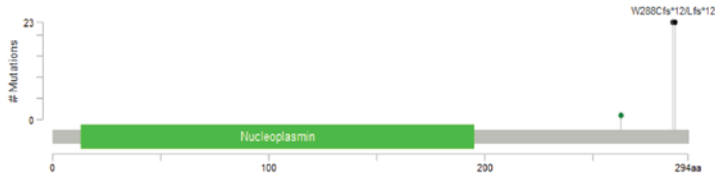**b**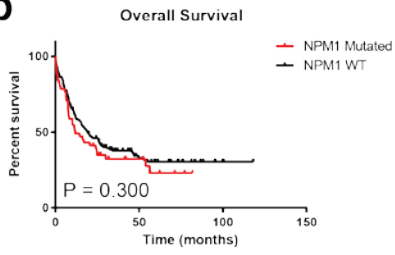**c**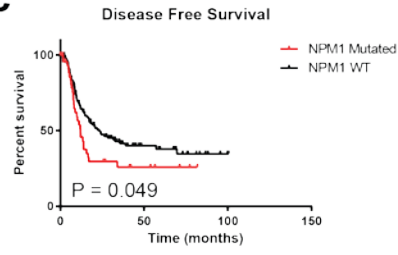**d**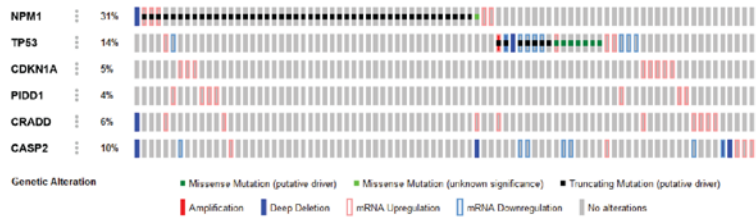**e**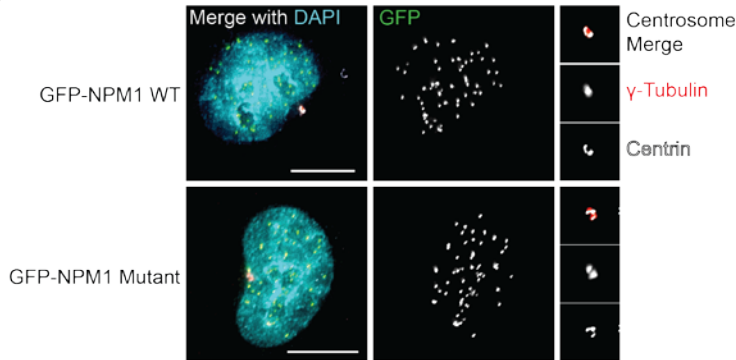**f**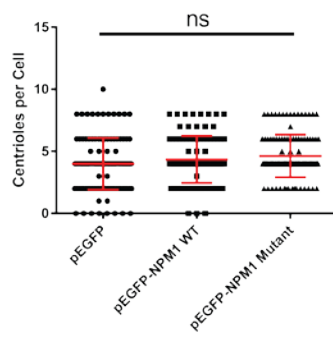**g**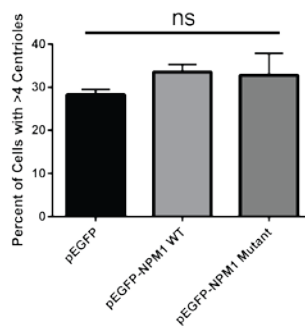

## Supplemental Figure 2. Investigation of alterations in CPAP and CP110.

(A) Mutation diagram and prevalence of genomic alterations in CPAP. (B) Mutation diagram and prevalence of genomic alterations in CP110. Data were extracted using cBioPortal.

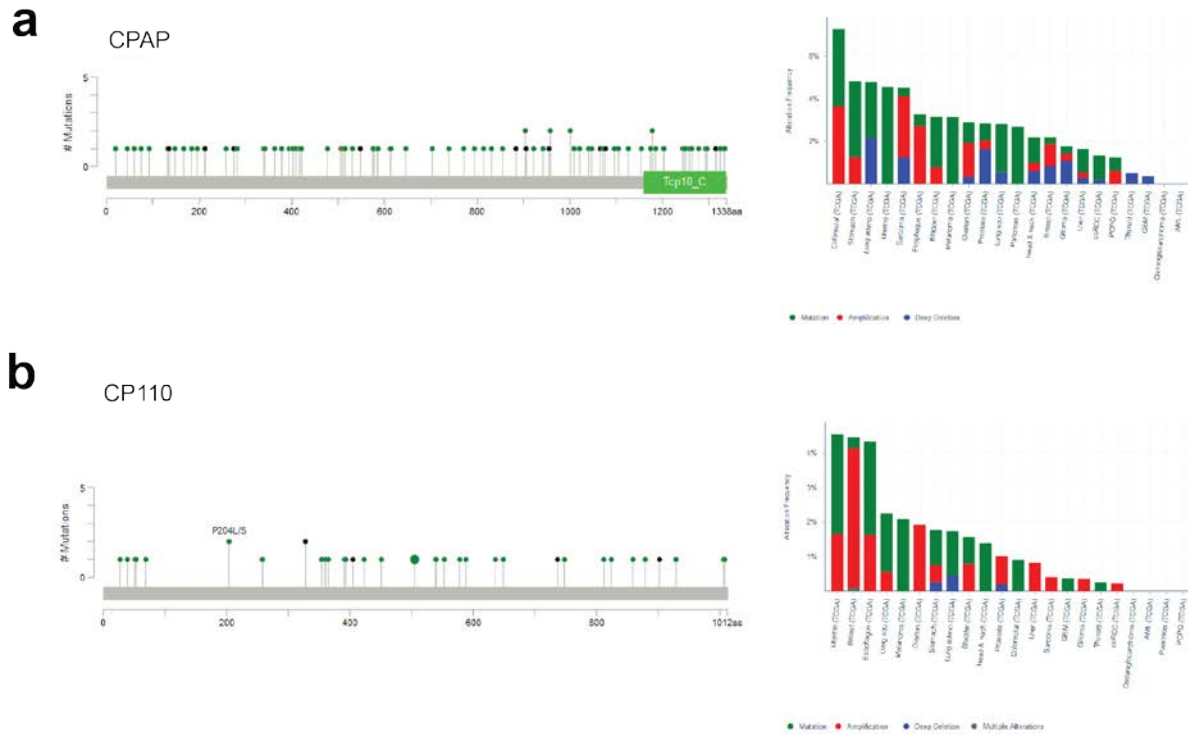

**Supplemental Figure 3. Investigation of alterations in PLK4 and its regulators.**

(A) Mutation diagram and prevalence of genomic alterations in PLK4, the master regulator of centriole duplication. (B) Mutation diagram and prevalence of genomic alterations in SKP1, which helps degrade autophosphorylated PLK4. (C) Mutation diagram and prevalence of genomic alterations in CUL1, which helps degrade autophosphorylated PLK4. (D) Mutation diagram and prevalence of genomic alterations in BTRC, which helps degrade autophosphorylated PLK4. Green = mutations; red = amplifications; blue = deletions. Data were extracted using cBioPortal.

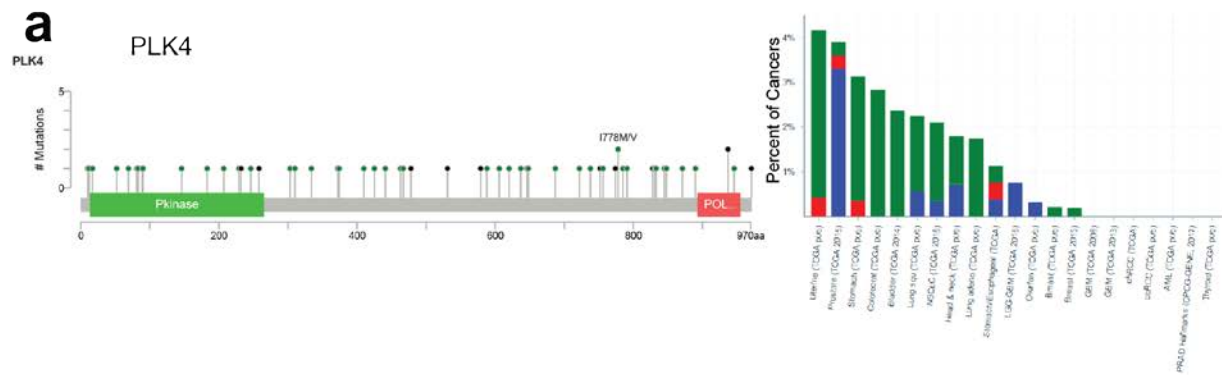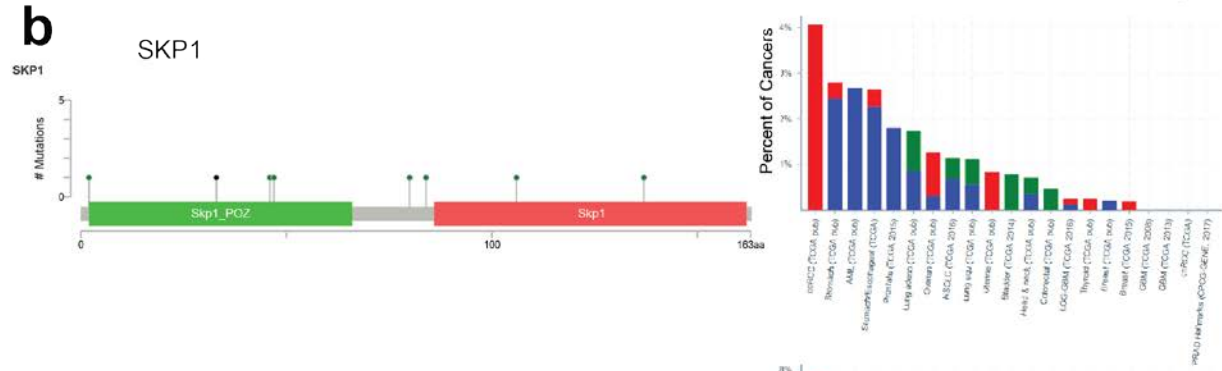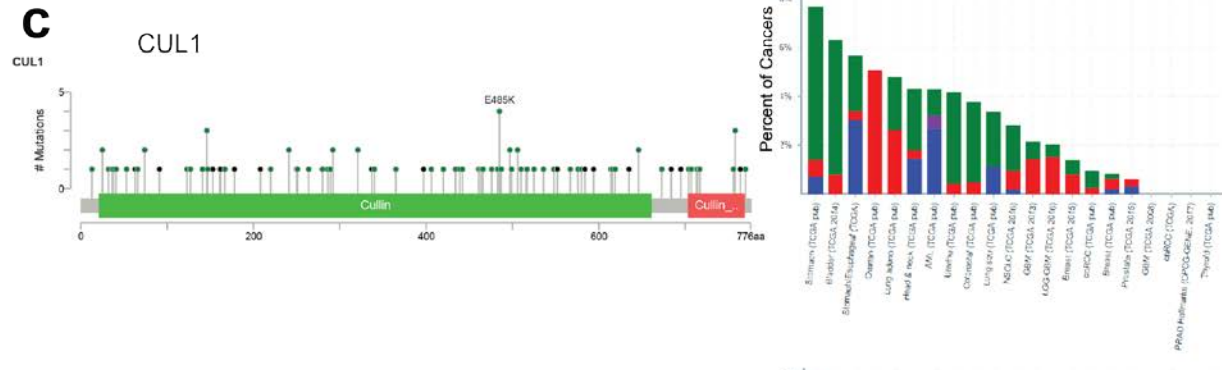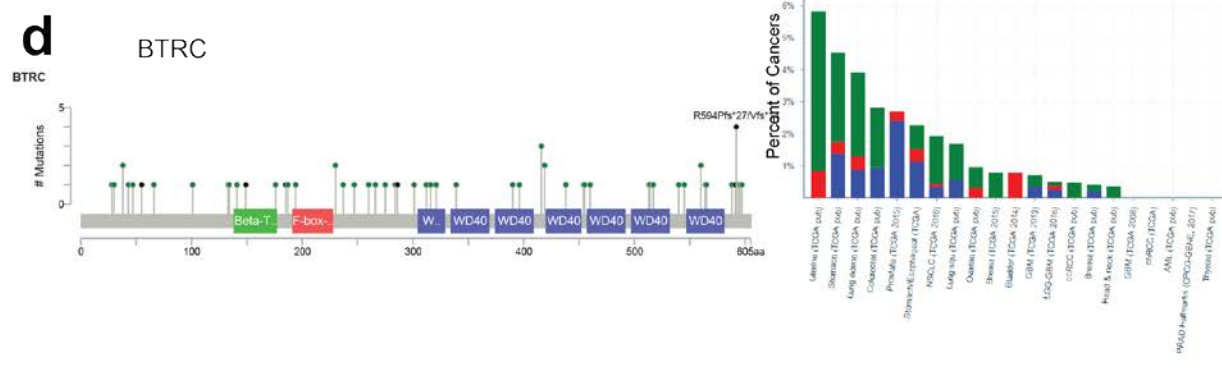

**Supplemental Figure 4. Overexpression of CTNNB1 does not cause centrosome amplification.**

**(A)** Representative images of HeLa cells transfected with pcDNA3, wild type CTNNB1, or CTNNB1 S33Y. Scale bars = 5 $\mu$ m. **(B)** Quantification of centrioles (centrin foci) in the indicated conditions. Each dot represents one cell. Bars represent means  $\pm$  SD.

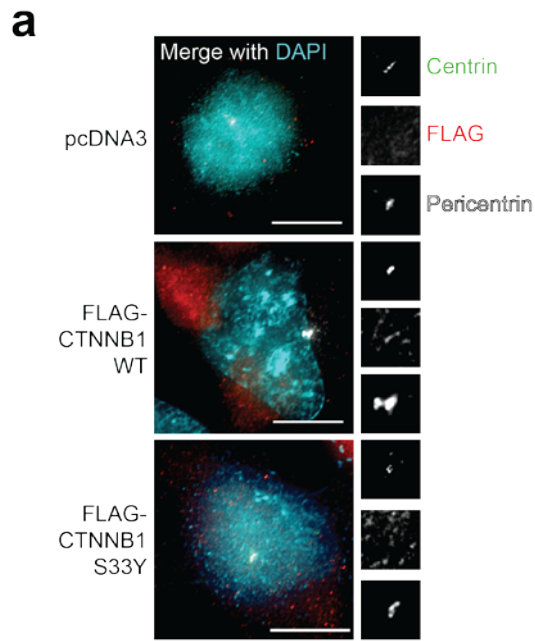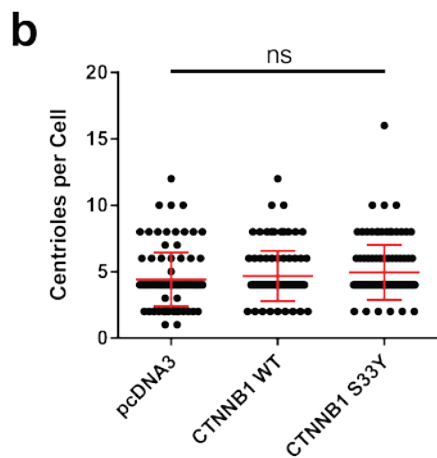



**Supplemental Figure 5. CDK2 activity and expression and whole-cell STIL expression are not altered by MCPH1 depletion.**

(A) Kinase assay using CDK2 immunoprecipitated from the indicated cell conditions. Anti-FLAG antibody was used as a control (“Control Ab”). Milciclib is a CDK2 inhibitor. Histone H1 was used as the substrate. (B-C) Quantification of CDK2 intensity at the centrosome (B) and in the entire cell (C) in the indicated conditions. (D) Quantification of whole cell STIL immunofluorescence in asynchronous cells. (E) Western blotting for STIL expression using whole-cell extracts. Indications are made for molecular weight markers. Throughout the figure, each dot represents a single cell, bars represent means  $\pm$  SD, ns = not significant.

**a**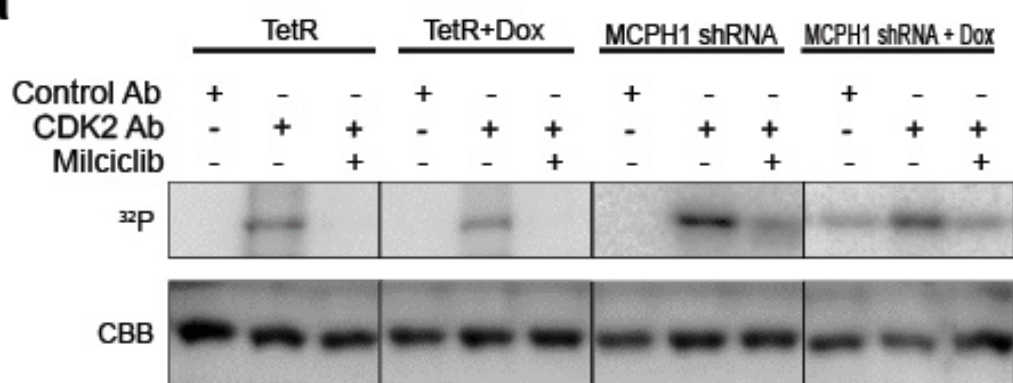**b**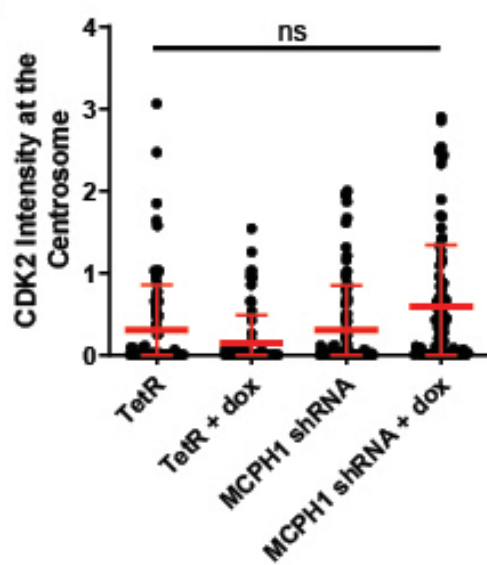**c**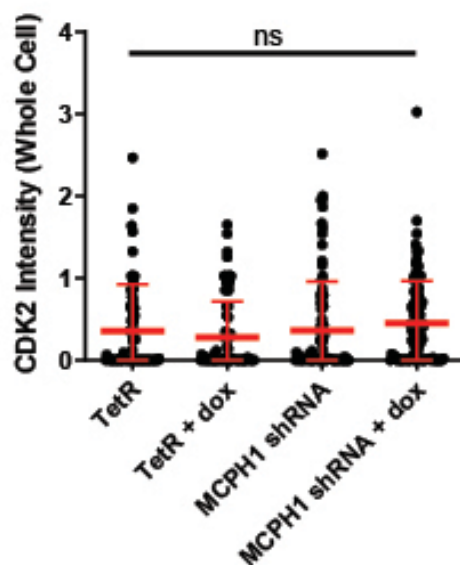**d**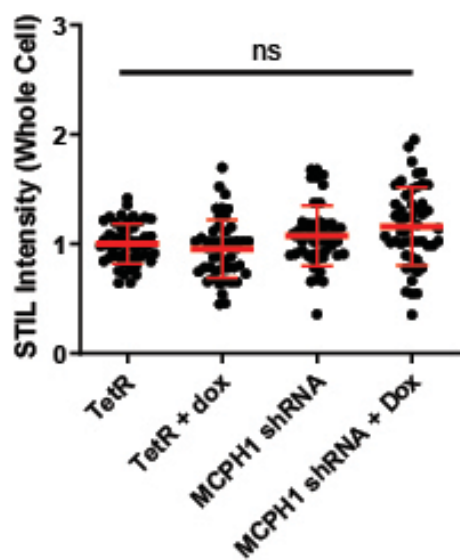**e**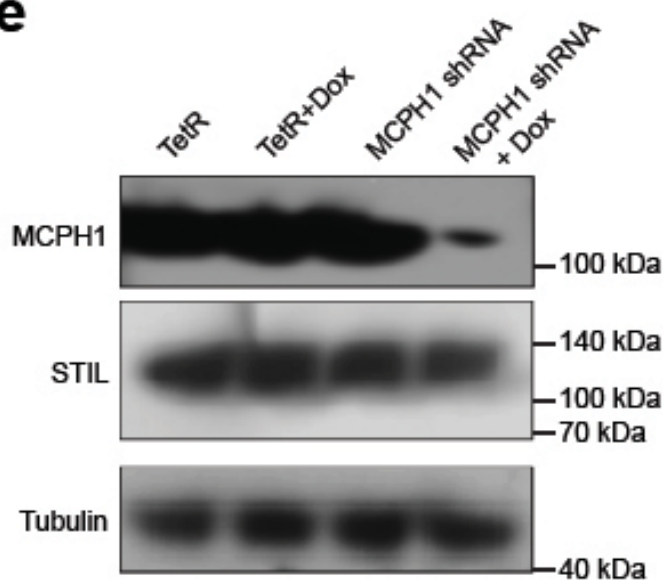

**Supplemental Figure 6. MCPH1 depletion causes genomic instability.**

(A) HeLa cell lines were fixed with methanol, stained, and analyzed. The images depict representatives of the different mitotic phenotypes that were assessed. Scale bars = 5  $\mu$ m. ACA = anti-centromere antibody (CREST). (B) Quantification of metaphase cells as either normal bipolar, multipolar, monopolar, or misaligned (includes polar chromosomes). (C) Quantification of anaphase cells as either normal bipolar, lagging or bridge chromosomes, or multipolar. Bars represent means  $\pm$ SEM from 3 independent experiments of at least 100 metaphase cells and 50 anaphase cells in each experiment (i.e. total n > 300 metaphase cells and >150 anaphase cells). \*P value < 0.05 for 2-way ANOVA interaction.

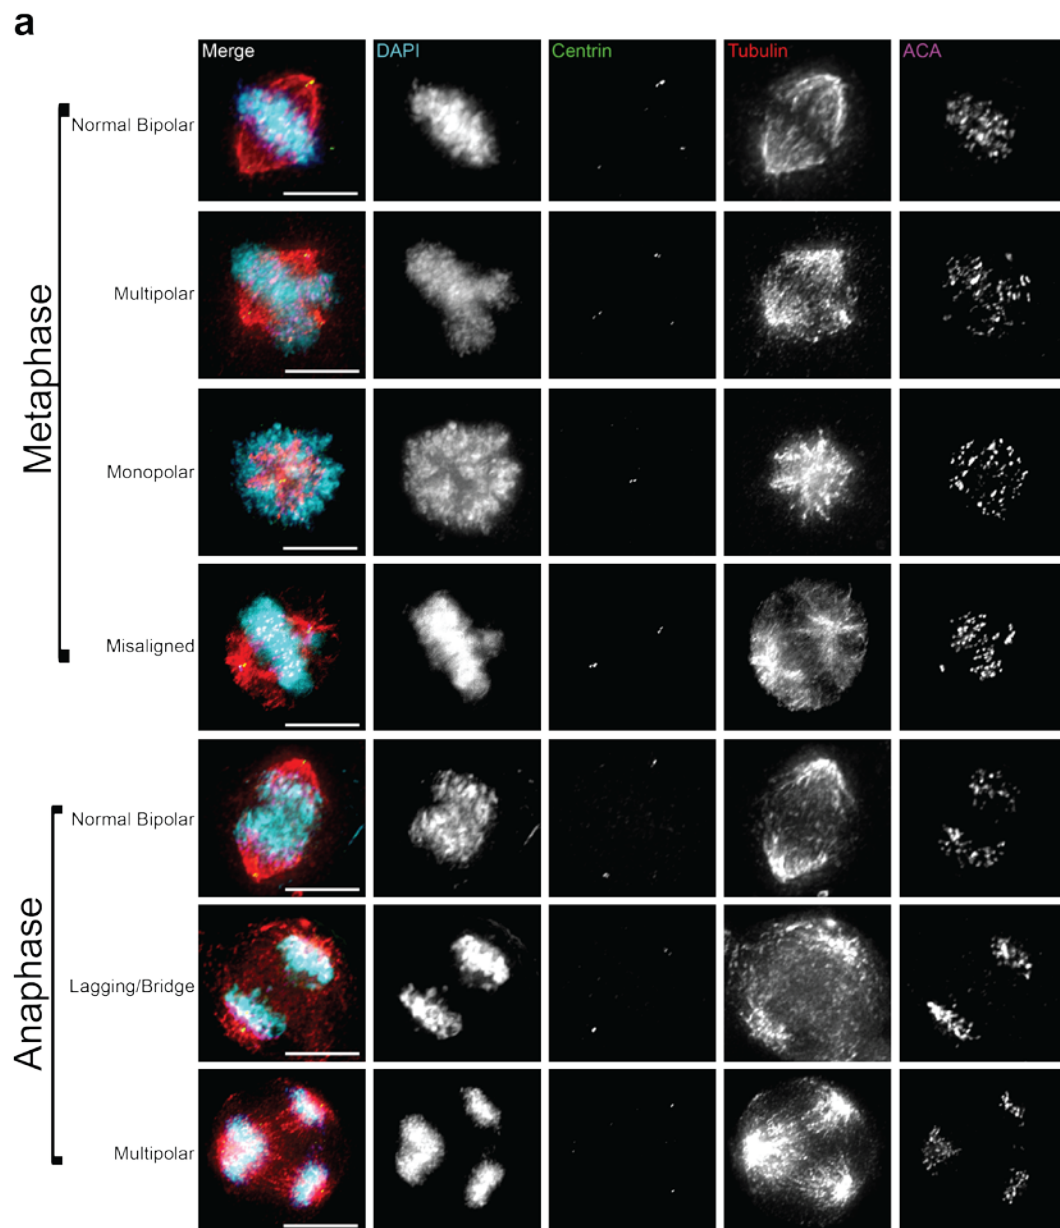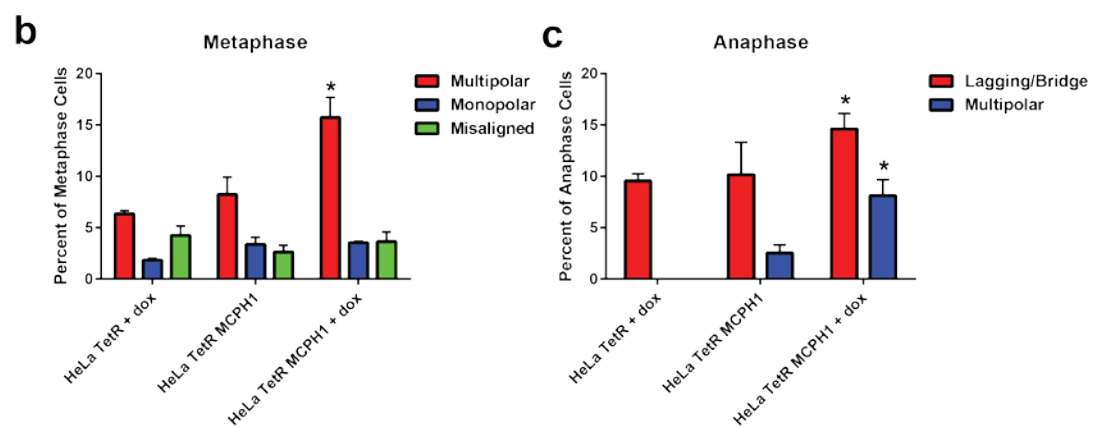

**Supplemental Figure 8. Uncropped immunoblots shown in figures.**

Figure 7a

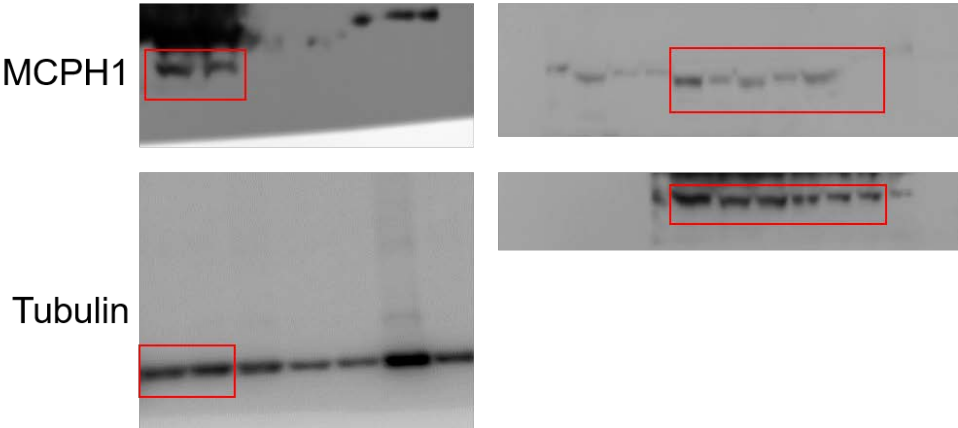

Supplement: 41598_2020_68629_MOESM1_ESM.pdf [file 41598_2020_68629_MOESM1_ESM.pdf]
